# Supplementary material
Source: Springer Nature journal article supplement (https://www.springermedizin.de/resource/supplementary/12990_2013_598_MOESM10_ESM.pdf/9613590)

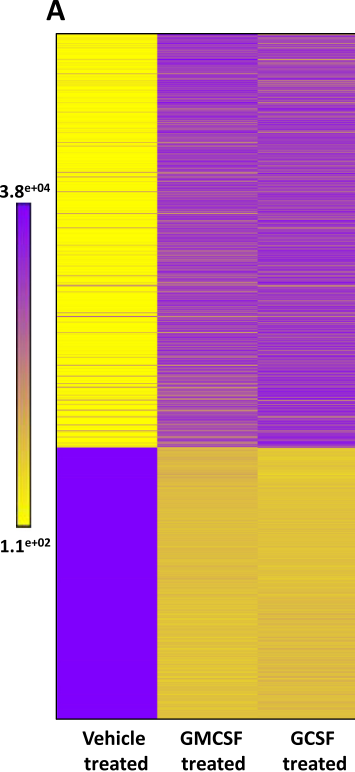

**C**

| Gene                                                                       | GMCSF-induced fold-change | GCSF-induced fold-change |
|----------------------------------------------------------------------------|---------------------------|--------------------------|
| <b>chemokine (C-C motif) ligand 3 (Ccl3)</b>                               | 103.1                     | 5.5                      |
| chemokine (C-C motif) ligand 2 (Ccl2)                                      | 26.5                      | 3.4                      |
| voltage-dependent anion channel 3 (Vdac3)                                  | 15.1                      | 15.5                     |
| <b>Mus musculus calpain 2 (Capn2)</b>                                      | 7.6                       | 8.3                      |
| transient receptor potential cation channel, subfamily V, member 1 (Trpv1) | 1.5                       | 3.9                      |
| <b>RAS-related C3 botulinum substrate 1 (Rac1)</b>                         | 5.5                       | 4.6                      |
| <b>synapsin II (Syn2)</b>                                                  | -3.3                      | -2.0                     |
| calcium channel, voltage-dependent, alpha2/delta subunit 1 (Cacna2d1)      | -2.5                      | -1.6                     |
| glutamate receptor interacting protein 1 (Grip1), transcript variant 2     | -2.0                      | -1.6                     |
| <b>matrix metalloproteinase 9 (Mmp9)</b>                                   | 5.3                       | 1.0                      |
| <b>chemokine (C-C motif) ligand 5 (Ccl5)</b>                               | 52.2                      | -2.0                     |
| matrix metalloproteinase 3 (Mmp3)                                          | 16.1                      | -1.4                     |
| <b>interleukin 1 alpha (Il1a)</b>                                          | 42.0                      | 1.2                      |

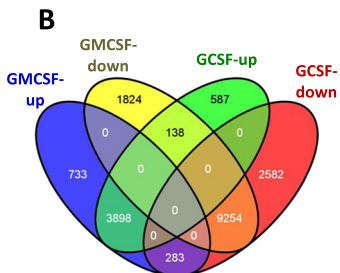

Supplement: MOESM10 [file 9613590]
